# Supplementary material for: Revisiting the Central Dogma: the distinct roles of genome, methylation, transcription, and translation on protein expression in Arabidopsis thaliana
Source: Research Square preprint supplement (doi:10.21203/rs.3.rs-5788572/v1), 2025-05-23
Supplement: Supplementary file 3 [file 57e9af7b2d1349dd09fb0519.xlsx]

## Sheet: Col.ANOVA
analysis	source	df	logP	R.Sq	Cum.R.Sq
Col-gbM ~ Can-gbM	gbM.alt	1	2670.8	0.79443	0.79443
Col-gbM ~ CDS	protein.length	1	555.694	0.227654	0.227654
Col-gbM ~ CDS	amino.acid.usage	19	115.224	0.0472826	0.274937
Col-gbM ~ CDS	codon.usage	41	332.164	0.144646	0.419583
Col-gbM* ~ Can-gbM	gbM.alt	1	2423.51	0.685844	0.685844
Col-gbM* ~ CDS	protein.length	1	154.013	0.0623791	0.0623791
Col-gbM* ~ CDS	amino.acid.usage	19	31.5161	0.0173067	0.0796859
Col-gbM* ~ CDS	codon.usage	41	206.234	0.100992	0.180678
Col-mRNA ~ Can-mRNA	mRNA.alt	1	4900.46	0.945175	0.945175
Col-mRNA ~ CDS+gbM	protein.length	1	154.418	0.0770466	0.0770466
Col-mRNA ~ CDS+gbM	amino.acid.usage	19	99.5181	0.0572473	0.134294
Col-mRNA ~ CDS+gbM	codon.usage	41	89.9317	0.059621	0.193915
Col-mRNA ~ CDS+gbM	gbM	1	1.86685	0.000636764	0.194552
Col-mRNA ~ gbM	gbM	1	60.5989	0.0345316	0.0345316
Col-mRNA* ~ Can-mRNA	mRNA.alt	1	4559.47	0.886865	0.886865
Col-mRNA* ~ CDS+gbM	protein.length	1	64.7856	0.0278777	0.0278777
Col-mRNA* ~ CDS+gbM	amino.acid.usage	19	66.3097	0.0354942	0.0633719
Col-mRNA* ~ CDS+gbM	codon.usage	41	58.1113	0.037515	0.100887
Col-mRNA* ~ CDS+gbM	gbM	1	0.249609	3.14558e-05	0.100918
Col-mRNA* ~ gbM	gbM	1	0.239066	3.23587e-05	3.23587e-05
Col-protein ~ Can-protein	protein.alt	1	3071.9	0.837929	0.837929
Col-protein ~ CDS+gbM+mRNA	protein.length	1	197.814	0.0598891	0.0598891
Col-protein ~ CDS+gbM+mRNA	amino.acid.usage	19	375.21	0.128089	0.187978
Col-protein ~ CDS+gbM+mRNA	codon.usage	41	187.166	0.06819	0.256168
Col-protein ~ CDS+gbM+mRNA	gbM	1	2.57587	0.00056437	0.256733
Col-protein ~ CDS+gbM+mRNA	mRNA	1	728.899	0.261914	0.518647
Col-protein ~ gbM	gbM	1	30.7118	0.0173611	0.0173611
Col-protein ~ gbM+mRNA	gbM	1	52.8651	0.0173611	0.0173611
Col-protein ~ gbM+mRNA	mRNA	1	953.042	0.42353	0.440891

## Sheet: Can ANOVA
analysis	source	df	logP	R.Sq	Cum.R.Sq
Can-gbM ~ cDNA	protein.length	1	555.651	0.227469	0.227469
Can-gbM ~ cDNA	amino.acid.usage	19	127.644	0.0520434	0.279513
Can-gbM ~ cDNA	codon.usage	41	322.649	0.140489	0.420001
Can-gbM ~ Col-gbM	gbM.alt	1	2670.8	0.79443	0.79443
Can-gbM* ~ cDNA	protein.length	1	104.493	0.0433039	0.0433039
Can-gbM* ~ cDNA	amino.acid.usage	19	24.1724	0.0146143	0.0579182
Can-gbM* ~ cDNA	codon.usage	41	175.201	0.0902948	0.148213
Can-gbM* ~ Col-gbM	gbM.alt	1	2423.51	0.685844	0.685844
Can-mRNA ~ cDNA+gbM	protein.length	1	161.711	0.0811523	0.0811523
Can-mRNA ~ cDNA+gbM	amino.acid.usage	19	100.756	0.0580897	0.139242
Can-mRNA ~ cDNA+gbM	codon.usage	41	77.2366	0.0527432	0.191985
Can-mRNA ~ cDNA+gbM	gbM	1	0.0925911	6.19103e-06	0.191991
Can-mRNA ~ Col-mRNA	mRNA.alt	1	4900.46	0.945175	0.945175
Can-mRNA ~ gbM	gbM	1	48.4174	0.0275629	0.0275629
Can-mRNA* ~ cDNA+gbM	protein.length	1	72.9066	0.0317167	0.0317167
Can-mRNA* ~ cDNA+gbM	amino.acid.usage	19	50.3413	0.0281594	0.0598761
Can-mRNA* ~ cDNA+gbM	codon.usage	41	51.0639	0.0342232	0.0940993
Can-mRNA* ~ cDNA+gbM	gbM	1	1.70069	0.000512828	0.0946121
Can-mRNA* ~ Col-mRNA	mRNA.alt	1	4559.47	0.886865	0.886865
Can-mRNA* ~ gbM	gbM	1	1.29907	0.00039802	0.00039802
Can-protein ~ cDNA+gbM+mRNA	protein.length	1	177.838	0.0557902	0.0557902
Can-protein ~ cDNA+gbM+mRNA	amino.acid.usage	19	356.809	0.126625	0.182415
Can-protein ~ cDNA+gbM+mRNA	codon.usage	41	174.949	0.066815	0.24923
Can-protein ~ cDNA+gbM+mRNA	gbM	1	4.85797	0.00123231	0.250463
Can-protein ~ cDNA+gbM+mRNA	mRNA	1	671.978	0.247334	0.497797
Can-protein ~ Col-protein	protein.alt	1	3071.9	0.837929	0.837929
Can-protein ~ gbM	gbM	1	20.2318	0.0112916	0.0112916
Can-protein ~ gbM+mRNA	gbM	1	33.686	0.0112916	0.0112916
Can-protein ~ gbM+mRNA	mRNA	1	900.294	0.408279	0.419571
