# Supplementary material for: Revisiting the Central Dogma: the distinct roles of genome, methylation, transcription, and translation on protein expression in Arabidopsis thaliana
Source: Research Square preprint supplement (doi:10.21203/rs.3.rs-5788572/v1), 2025-05-23
Supplement: Supplementary file 4 [file 5f17310a292969c1a5f21ff8.xlsx]

## Sheet: Supplementary Table 2
(a) Comparisons between our Col-0 assembly and other published Col-0 assemblies
Measure	ColvsCol-CC	ColvsCol_CEN	ColvsTAIR10	ColvsCol_XJTU	ColvsCol_Lian
UnalignedBases_Mbp	1.11917	0.126144	0.267946	0.112954	1.559
Breakpoints	2015	619	1552	837	6131
Relocations	46	19	77	11	44
Translocations	2	0	6	2	4
Inversions	3	2	28	0	2
Large_Insertions	1137	182	266	361	3978
Tandem_duplication_insertion	5	56	55	32	29
Single_SNPs	9101	9895	9345	2353	28062
Single_Nucleotide_Indels	17561	11006	6894	4674	24916
(b) Comparisons between selected other Col-0 assemblies
	TAIR10vsCol_CC	TAIR10vsCol_CEN	TAIR10vsCol-XJTU	Col-CCvsCol-CEN
UnalignedBases_Mbp	0.715504	0.12471	0.124184	0.140906
Breakpoints	18078	12949	14007	724
Relocations	61	64	63	24
Translocations	3	1	4	6
Inversions	30	26	30	1
Large_Insertions	9857	6569	7076	198
Tandem_duplication_insertion	37	51	40	32
Single_SNPs	10213	11844	10791	10545
Single_Nucleotide_Indels	4670	8076	5600	9173
(c) Comparisons between out Can-0 assembly and other assemblies
	ColvsCan	CanvsCan_Lian
UnalignedBases_Mbp	26.4737	2.89457
Breakpoints	14507	7603
Relocations	205	52
Translocations	344	24
Inversions	119	0
Large_Insertions	5567	5674
Tandem_duplication_insertion	63	51
Single_SNPs	682351	22036
Single_Nucleotide_Indels	561365	14321
